# Supplementary material for: Autophagy controls mesenchymal stem cell properties and senescence during bone aging
Source: PubMed Central journal article supplement (PMC5770781; doi:10.1111/acel.12709), 2017-12-06
Supplement: ACEL-17-na-s001.pdf [file ACEL-17-na-s001.pdf]

### Supplementary Fig.1

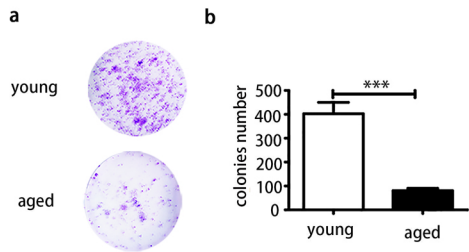

Aged BMMSCs presented reduced self-renewal capacity. (a, b) CFU staining of young and aged BMMSCs.

### Supplementary Fig.3

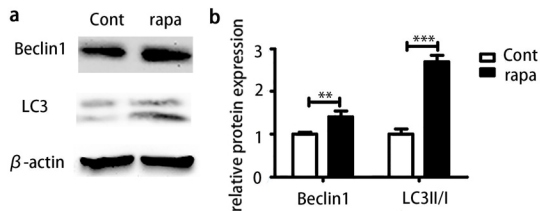

(a, b) BMMSCs from rapamycin-treated mice exhibited increased autophagy than control group by western blot.

### Supplementary Fig.2

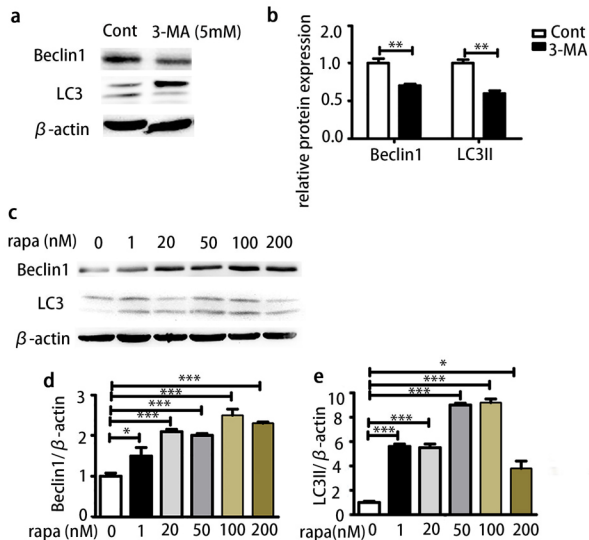

(a, b) 5mM 3-MA could reduce autophagy effectively. (c-e) 100 nM rapamycin could increase autophagy mostly.
